# Supplementary material for: A durable hydrophobic photothermal membrane based on a honeycomb structure MXene for stable and efficient solar desalination
Source: Royal Society of Chemistry journal article supplement (doi:10.1039/d3ra08157e), 2024-01-01
Supplement: d3ra08157e1.pdf [file d3ra08157e1.pdf]

**Durable hydrophobic photothermal membrane based on honeycomb  
structure MXene for stable and efficient Solar Desalination.**

Chunjiao Liu\*

*Institute of Xinyang Vocational and Technical College, Xinyang, Henan 464000, China*

\*Corresponding author. E-mail:liuchunjiao\_2006@126.com (C. Liu).

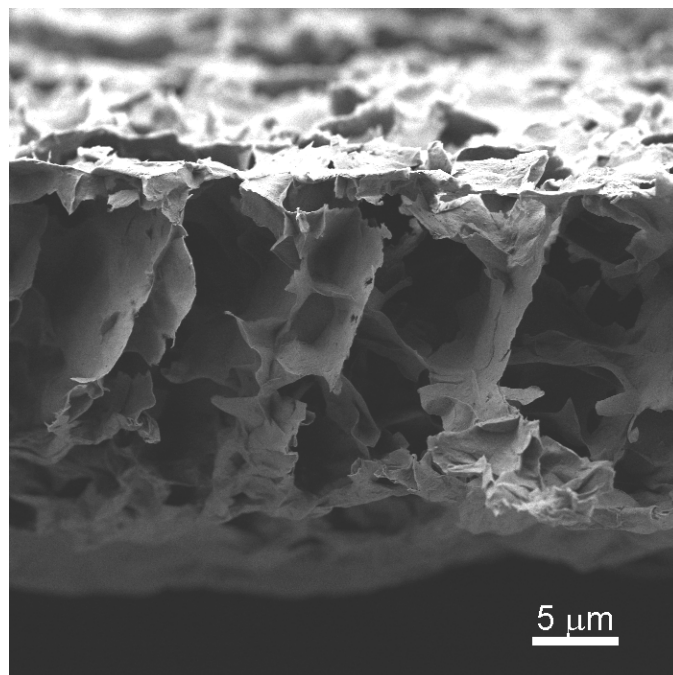

**Fig. S1.** Cross-sectional SEM images of hydrophobic MXene/AuNFs membrane. The thickness is about 18 μm.

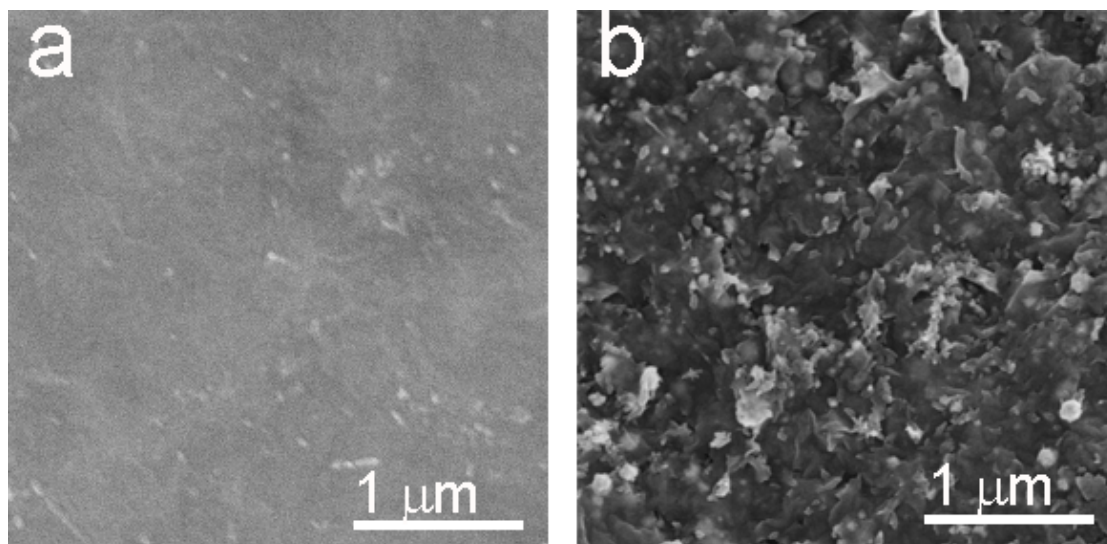

**Fig. S2.** Scanning electron microscopy (SEM) images of pristine MXene (a) and hydrophobic MXene/AuNFs (b).

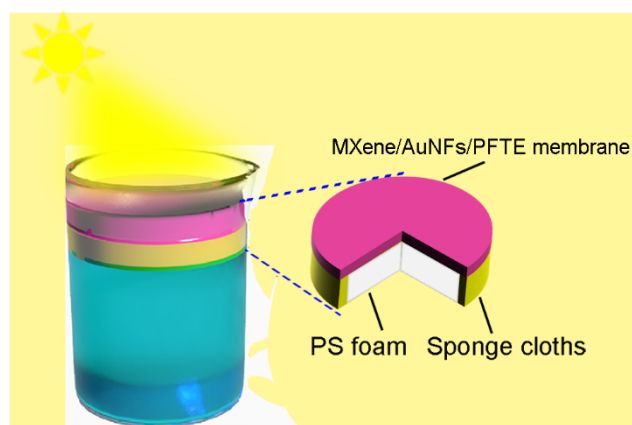

**Fig. S3.** The schematic drawing of solar driven water evaporator.

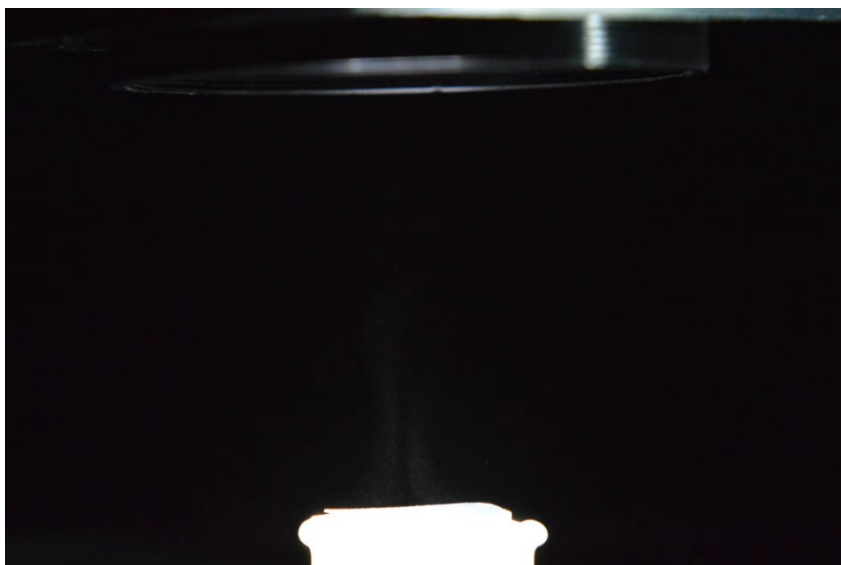

**Fig. S4.** Digital image showing visible steam generation enabled by the hydrophobic MXene/AuNFs membrane under  $4 \text{ kW m}^{-2}$  illumination.

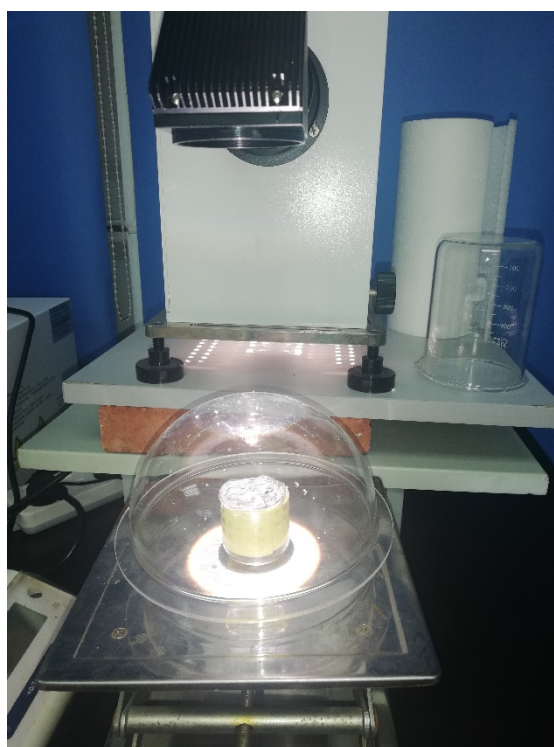

**Fig. S5.** Digital image of the water desalination device for freshwater production.

**Table S1.** A comparison of the solar steam generation performance of our results with some typical published data.

| Photothermal Materials                 | water evaporation rates (Kg m <sup>-2</sup> h <sup>-1</sup> ) | Efficiencies (% , 1 sun) | Efficiencies (% , 2 sun) | Efficiencies (% , x sun) | Ref. No.  |
|----------------------------------------|---------------------------------------------------------------|--------------------------|--------------------------|--------------------------|-----------|
| hydrophobic MXene/AuNFs                | 1.59                                                          | 97.8                     | □                        | □                        | This work |
| HPCM/PHS                               | 1.38                                                          | 90.8                     | □                        | □                        | [1]       |
| HN/CNT                                 | 1.09                                                          | 83.2                     | □                        | 92.8 (10 sun)            | [2]       |
| In-air calcinated MS                   | 1.98                                                          | 92                       | □                        | □                        | [3]       |
| Cu <sub>2</sub> SnSe <sub>3</sub>      | 1.657                                                         | 86.6                     | □                        | □                        | [4]       |
| carbon black/hollow glass microspheres | 1.38                                                          | 82.1                     | □                        | □                        | [5]       |
| AuNR/SWNT film                         | 1.85                                                          | 82                       | □                        | 94 (5 sun)               | [6]       |
| p-PEGDA-PANi                           | 1.4                                                           | 91.5                     | □                        | □                        | [7]       |
| CuS/MCE                                | 1.12                                                          | ~80±2.5                  | □                        | □                        | [8]       |
| MXene-PVDF                             | -                                                             | 84                       | □                        | □                        | [9]       |
| WO <sub>2,9</sub> nanorods             | 1.28                                                          | 81                       | □                        | □                        | [10]      |
| activated carbon fiber                 | 1.22                                                          | 79.4                     | □                        | □                        | [11]      |
| hydrophobic MXene                      | 1.31                                                          | 71                       | □                        | □                        | [12]      |
| N-doped graphene aerogel               | 1.558                                                         | 90                       | □                        | □                        | [13]      |
| wasted rice straw                      | 1.2                                                           | 75.8                     | □                        | □                        | [14]      |
| PPy-coated PVDF                        | 1.70                                                          | 93.8                     | □                        | □                        | [15]      |
| polymer aerogel                        | 0.987                                                         | 81                       | 85                       | 88 (3 sun)               | [16]      |
| black titania nanocages                | 1.13                                                          | 70.9                     | □                        | □                        | [17]      |
| PAAm-radial aerogel                    | 2.0                                                           | 85.7                     | □                        | □                        | [18]      |
| PEG MoS <sub>2</sub> -cotton cloth     | 1.287                                                         | 80.5                     | 86.8                     | 90.3 (5 sun)             | [19]      |
| GDY-based foam                         | 1.55                                                          | 91                       | □                        | □                        | [20]      |

## References

- [1] X. Ma, W. Fang, Y. Guo, Z. Li, D. Chen, W. Ying, et al., Hierarchical Porous SWCNT Stringed Carbon Polyhedrons and PSS Threaded MOF Bilayer Membrane for Efficient Solar Vapor Generation, *Small* 15(15) (2019) 1900354.
- [2] Z.-C. Xiong, Y.-J. Zhu, D.-D. Qin, F.-F. Chen, R.-L. Yang, Flexible Fire-Resistant

- Photothermal Paper Comprising Ultralong Hydroxyapatite Nanowires and Carbon Nanotubes for Solar Energy-Driven Water Purification, *Small* 14(50) (2018) 1803387.
- [3] F. Gong, H. Li, W. Wang, J. Huang, D. Xia, J. Liao, et al., Scalable, eco-friendly and ultrafast solar steam generators based on one-step melamine-derived carbon sponges toward water purification, *Nano Energy* 58 (2019) 322-330.
- [4] Y. Yang, H. Zhao, Z. Yin, J. Zhao, X. Yin, N. Li, et al., A general salt-resistant hydrophilic/hydrophobic nanoporous double layer design for efficient and stable solar water evaporation distillation, *Mater Horiz* 5(6) (2018) 1143-1150.
- [5] W. Zhang, G. Zhang, Q. Ji, H. Liu, R. Liu, J. Qu, Capillary-Flow-Optimized Heat Localization Induced by an Air-Enclosed Three-Dimensional Hierarchical Network for Elevated Solar Evaporation, *ACS Appl. Mater. Interfaces* 11(10) (2019) 9974-9983.
- [6] Y. Yang, X. Yang, L. Fu, M. Zou, A. Cao, Y. Du, et al., Two-Dimensional Flexible Bilayer Janus Membrane for Advanced Photothermal Water Desalination, *ACS Energy Lett.* 3(5) (2018) 1165-1171.
- [7] X. Yin, Y. Zhang, Q. Guo, X. Cai, J. Xiao, Z. Ding, et al., Macroporous Double-Network Hydrogel for High-Efficiency Solar Steam Generation Under 1 sun Illumination, *ACS Appl. Mater. Interfaces* 10(13) (2018) 10998-11007.
- [8] Z. Guo, X. Ming, G. Wang, B. Hou, X. Liu, T. Mei, et al., Super-hydrophilic copper sulfide films as light absorbers for efficient solar steam generation under one sun illumination, *Semicond. Sci. Technol.* 33(2) (2018) 025008.
- [9] R. Li, L. Zhang, L. Shi, P. Wang, MXene Ti<sub>3</sub>C<sub>2</sub>: An Effective 2D Light-to-Heat Conversion Material, *ACS Nano* 11(4) (2017) 3752-3759.

- [10] L. Sun, Z. Li, R. Su, Y. Wang, Z. Li, B. Du, et al., Phase-Transition Induced Conversion into a Photothermal Material: Quasi-Metallic WO<sub>2.9</sub> Nanorods for Solar Water Evaporation and Anticancer Photothermal Therapy, *Angew. Chem. Int. Ed.* 57(33) (2018) 10666-10671.
- [11] H. Li, Y. He, Y. Hu, X. Wang, Commercially Available Activated Carbon Fiber Felt Enables Efficient Solar Steam Generation, *ACS Appl. Mater. Interfaces* 10(11) (2018) 9362-9368.
- [12] J. Zhao, Y. Yang, C. Yang, Y. Tian, Y. Han, J. Liu, et al., A hydrophobic surface enabled salt-blocking 2D Ti<sub>3</sub>C<sub>2</sub> MXene membrane for efficient and stable solar desalination, *J. Mater. Chem. A* 6(33) (2018) 16196-16204.
- [13] B. Huo, D. Jiang, X. Cao, H. Liang, Z. Liu, C. Li, et al., N-doped graphene /carbon hybrid aerogels for efficient solar steam generation, *Carbon* 142 (2019) 13-19.
- [14] Q. Fang, T. Li, Z. Chen, H. Lin, P. Wang, F. Liu, Full Biomass-Derived Solar Stills for Robust and Stable Evaporation To Collect Clean Water from Various Water-Bearing Media, *ACS Appl. Mater. Interfaces* 11(11) (2019) 10672-10679.
- [15] Y. Wang, C. Wang, X. Song, M. Huang, S.K. Megarajan, S.F. Shaukat, et al., Improved light-harvesting and thermal management for efficient solar-driven water evaporation using 3D photothermal cones, *J. Mater. Chem. A* 6(21) (2018) 9874-9881.
- [16] P. Mu, W. Bai, Z. Zhang, J. He, H. Sun, Z. Zhu, et al., Robust aerogels based on conjugated microporous polymer nanotubes with exceptional mechanical strength for efficient solar steam generation, *J. Mater. Chem. A* 6(37) (2018) 18183-18190.
- [17] F. Jiang, H. Liu, Y. Li, Y. Kuang, X. Xu, C. Chen, et al., Lightweight, Mesoporous,

and Highly Absorptive All-Nanofiber Aerogel for Efficient Solar Steam Generation, ACS Appl. Mater. Interfaces 10(1) (2018) 1104-1112.

[18] W. Xu, Y. Xing, J. Liu, H. Wu, Y. Cui, D. Li, et al., Efficient Water Transport and Solar Steam Generation via Radially, Hierarchically Structured Aerogels, ACS Nano (13) (2019) 7930-7938.

[19] Z. Guo, G. Wang, X. Ming, T. Mei, J. Wang, J. Li, et al., PEGylated Self-Growth MoS<sub>2</sub> on a Cotton Cloth Substrate for High-Efficiency Solar Energy Utilization, ACS Appl. Mater. Interfaces 10(29) (2018) 24583-24589.

[20] X. Gao, H. Ren, J. Zhou, R. Du, C. Yin, R. Liu, et al., Synthesis of Hierarchical Graphdiyne-Based Architecture for Efficient Solar Steam Generation, Chem. Mater. 29(14) (2017) 5777-5781.
